# Supplementary material
Source: PubMed Central journal article supplement (PMC4623841)
Supplement: NIHMS714273-supplement-Supplement.pdf [file NIHMS714273-supplement-Supplement.pdf]

734

735

736

737

**Supplemental information**

738

**Table S1: Primers used in this study**

| Primer name                  | Sequence (5'-3')                                 |
|------------------------------|--------------------------------------------------|
| <b>a) Cloning Primers</b>    |                                                  |
| 2468-fwd                     | TTTGTACAAAAAAGCAGGCACCATGAATGCGGACGCCGTTTCTCCGAC |
| 2468-rev                     | TTTGTACAAGAAAGCTGGGTTGCCGGTCGCACTCAGTTGCTTCGG    |
| <b>b) Sequencing Primers</b> |                                                  |
| IC-1006-fwd                  | TAATACGACTCACTATAGGG                             |
| IC-1006-rev                  | TGCTAGTTATTGCTCAGCGG                             |

739

740

741

742

743

744

745

746

747

748

749

750

751

752

753

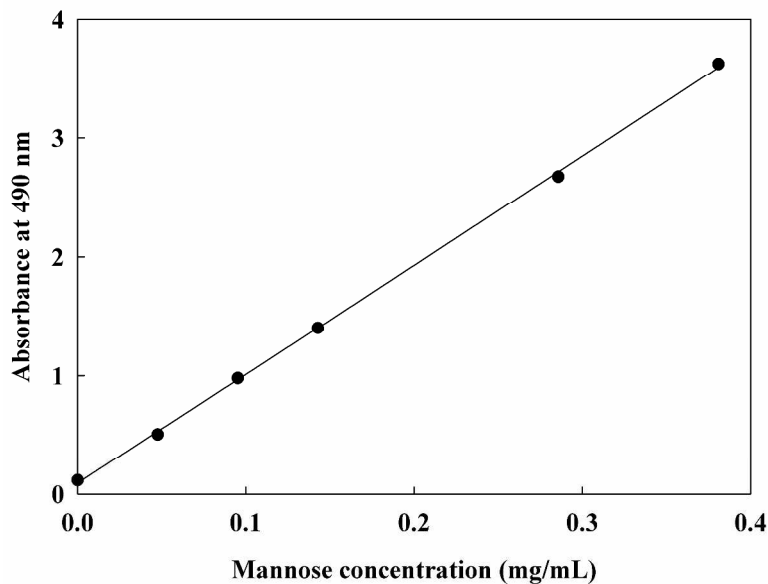

763 **Figure S1. Calibration curve of D-mannose.** The concentration range studied was from  
764 0 to 0.38 mg/mL. The linear equation was:  $y = 9.1848x + 0.0919$ ,  $R^2 = 0.9995$ .

765  
766  
767  
768  
769  
770  
771  
772  
773  
774  
775  
776  
777  
778  
779  
780  
781  
782  
783  
784  
785  
786
